# Supplementary material for: Improving the electron transport performance by changing side chains in sulfur-containing azaacenes: a combined theoretical investigation on free molecules and an adsorption system
Source: Royal Society of Chemistry journal article supplement (doi:10.1039/c8nj06408c), 2019-01-01
Supplement: c8nj06408c1.pdf [file c8nj06408c1.pdf]

## Electronic supplementary information

### **Improving the electron transport performance by changing side chains in sulfur-containing azaacenes: A combined theoretical investigation on free molecule and adsorption system†**

Keke Wen,<sup>a</sup> Xiao Pan,<sup>a</sup> Songyan Feng,<sup>a</sup> Wenpeng Wu,<sup>\*a</sup> Xugeng Guo,<sup>\*a</sup> Jinglai Zhang<sup>\*a</sup>

*<sup>a</sup> Henan Provincial Engineering Research Center of Green Anticorrosion Technology for Magnesium Alloy, College of Chemistry and Chemical Engineering, Henan University, Kaifeng 475004, P.R. China. E-mails: wuwp@henu.edu.cn; xgguo@henu.edu.cn; zhangjinglai@henu.edu.cn*

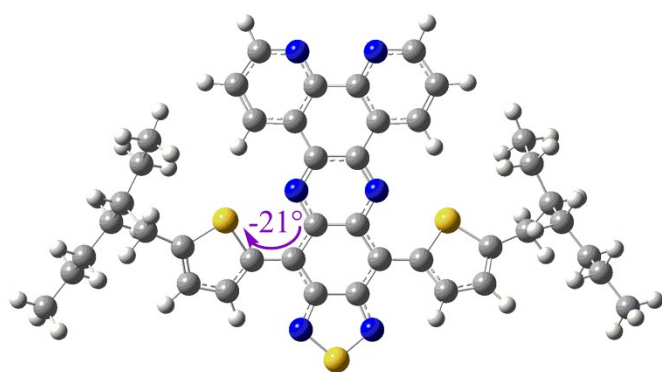

**TDTP**

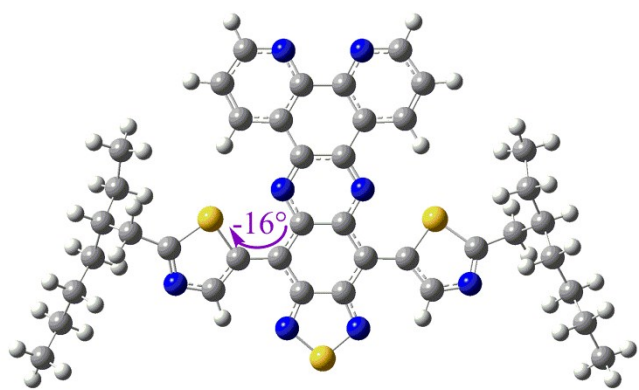

**TDTP-I**

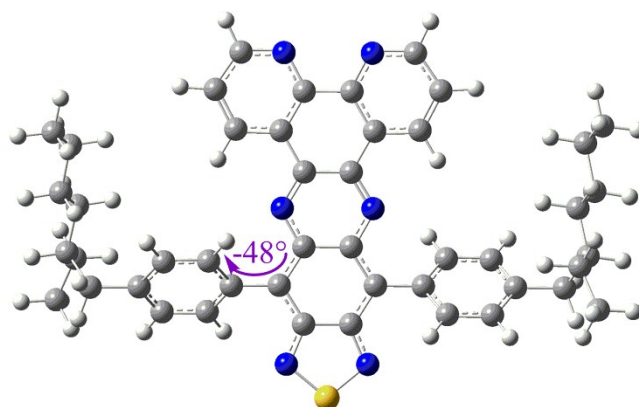

**TDTP-II**

**Fig. S1** Optimized ground state structures at the B3LYP/6-31G(d,p) level.

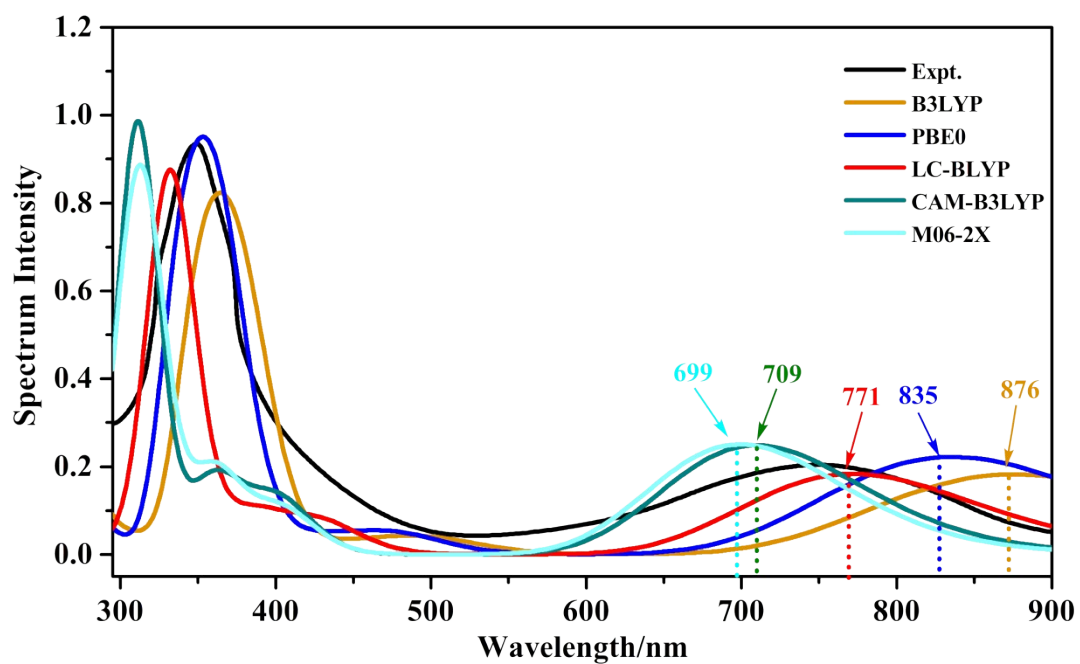

**Fig. S2** The simulated absorption spectrum of **TDTP** by means of B3LYP, PBE0, LC-BLYP, CAM-B3LYP, and M06-2X methods in dichloromethane with the 6-31G(d,p) basis set along with the experimental result.<sup>9</sup> The value of the maximum absorption peak is marked on the chart.

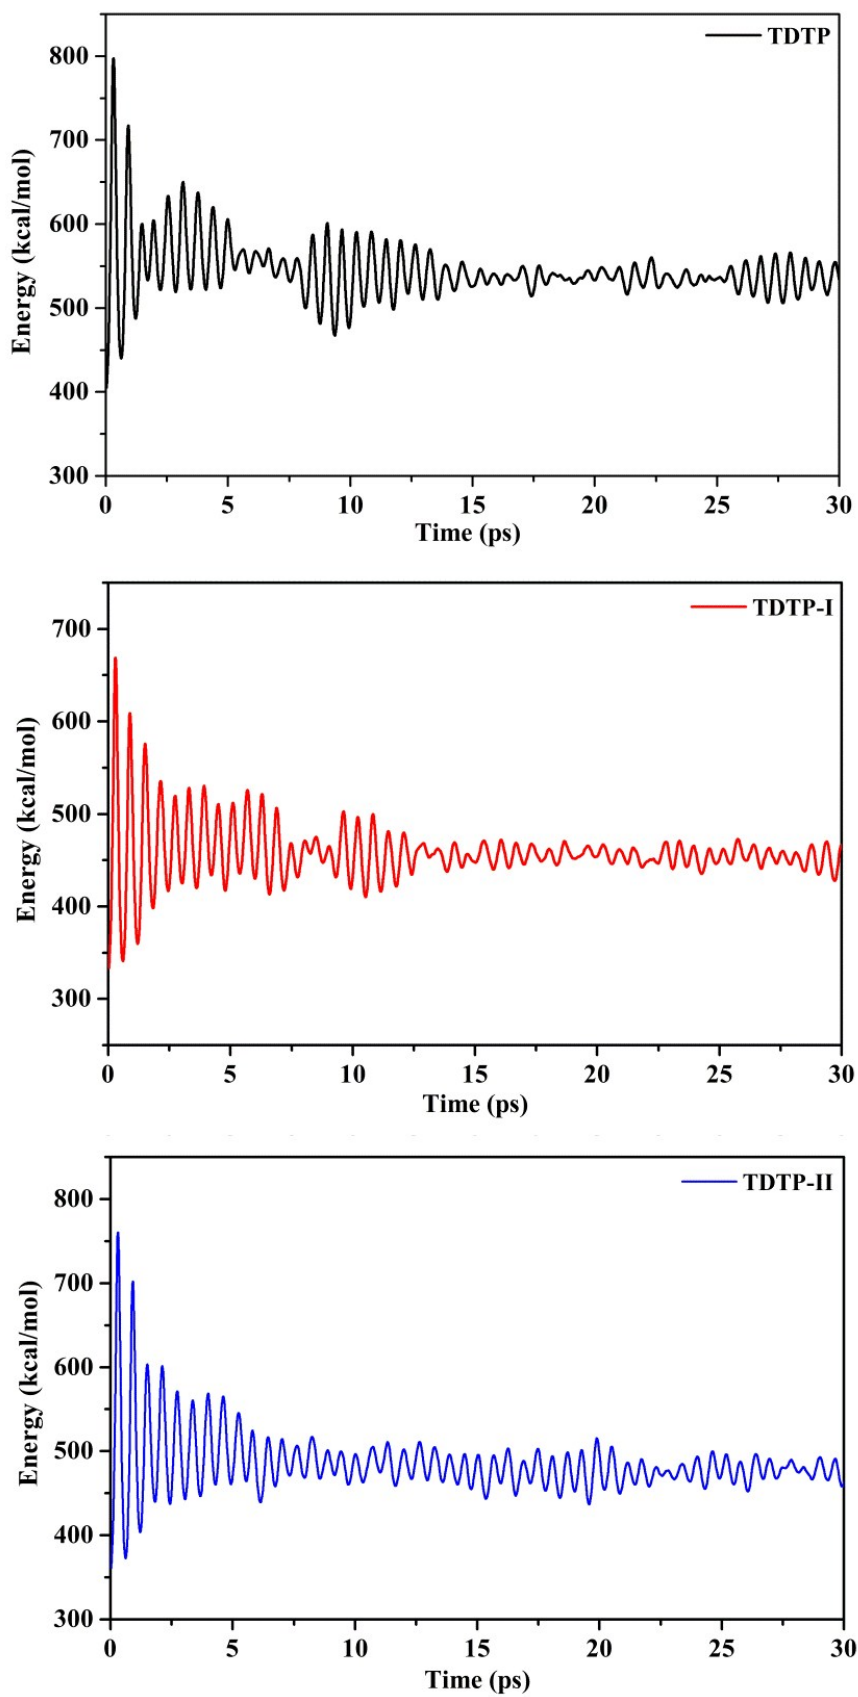

**Fig. S3** Evolutions of the total energy as a function of the simulation time.

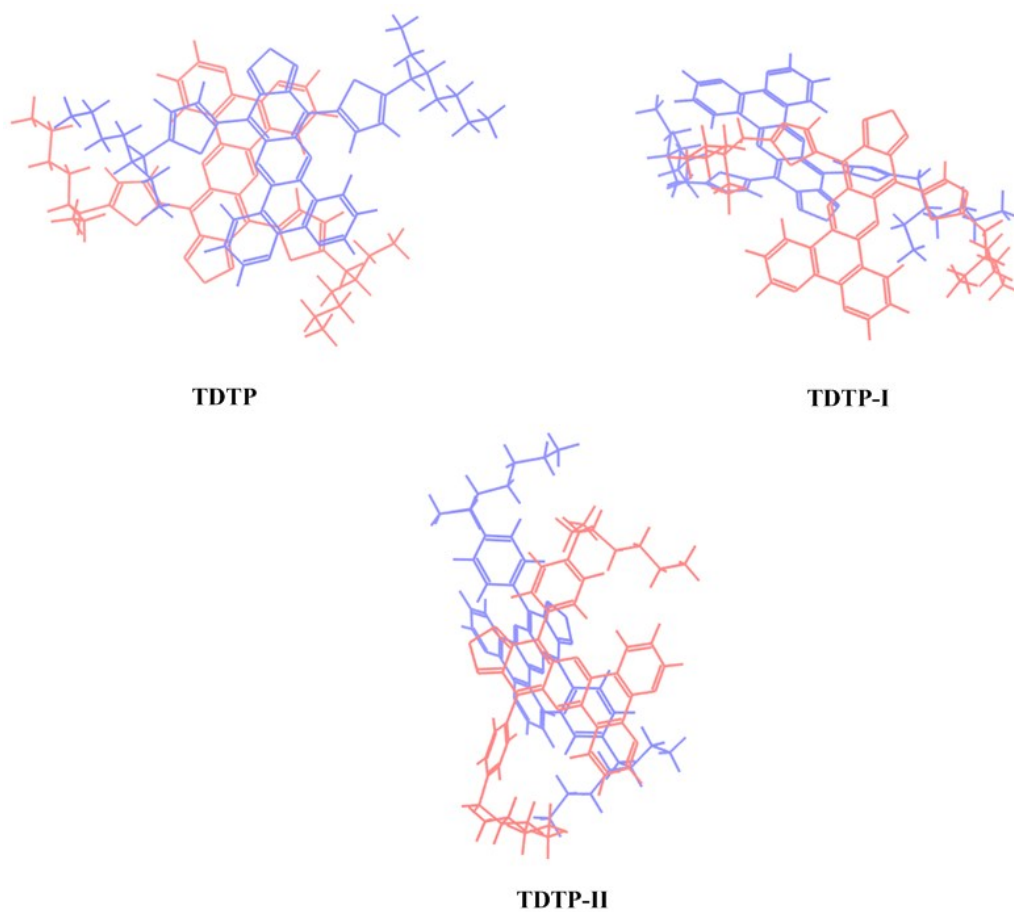

**Fig. S4** Optimized dimers at the M06-2X/6-31G(d,p) level.

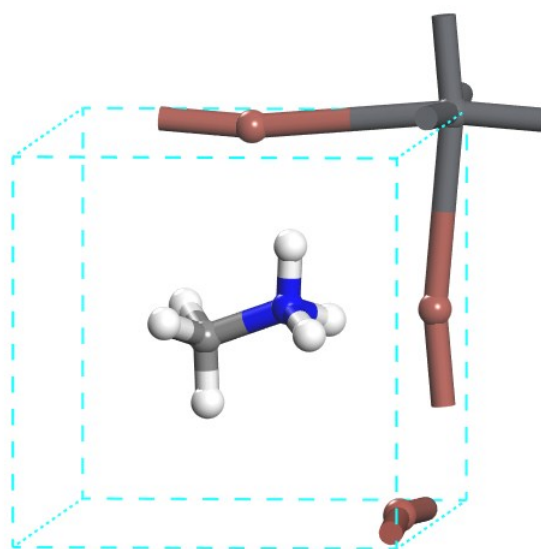

**Fig. S5** The optimized crystal structure of  $\text{CH}_3\text{NH}_3\text{PbI}_3$ .

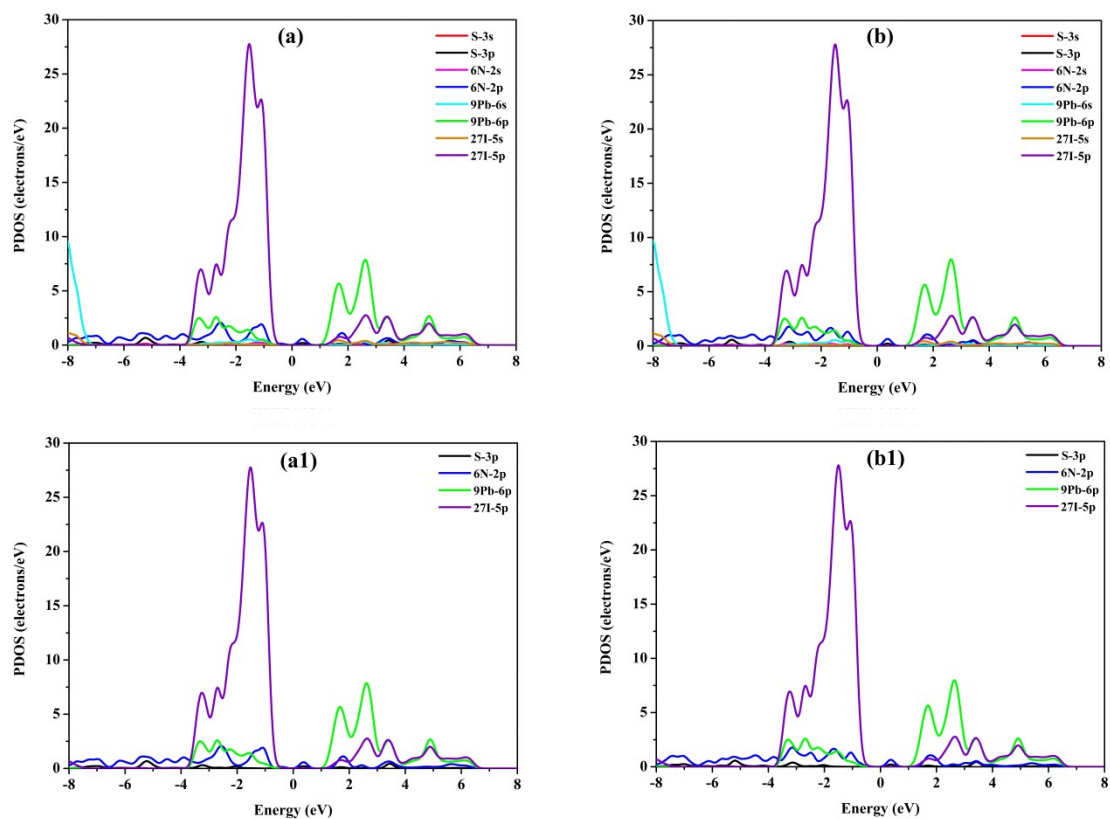

**Fig. S6** The PDOS of s and p orbitals of S, N, Pb and I of **TDTP** ((a), (a1)) and **TDTP-II** ((b), (b1)) absorbed on the  $\text{CH}_3\text{NH}_3\text{PbI}_3$  (110) facet. (Note: the six nitrogen atoms and one sulfur atom represent the atoms in the backbone of the investigated molecules, and the nine lead atoms and twenty-seven iodine atoms of methylammonium iodide monolayer are closest and directly opposite to the two ETMs.)

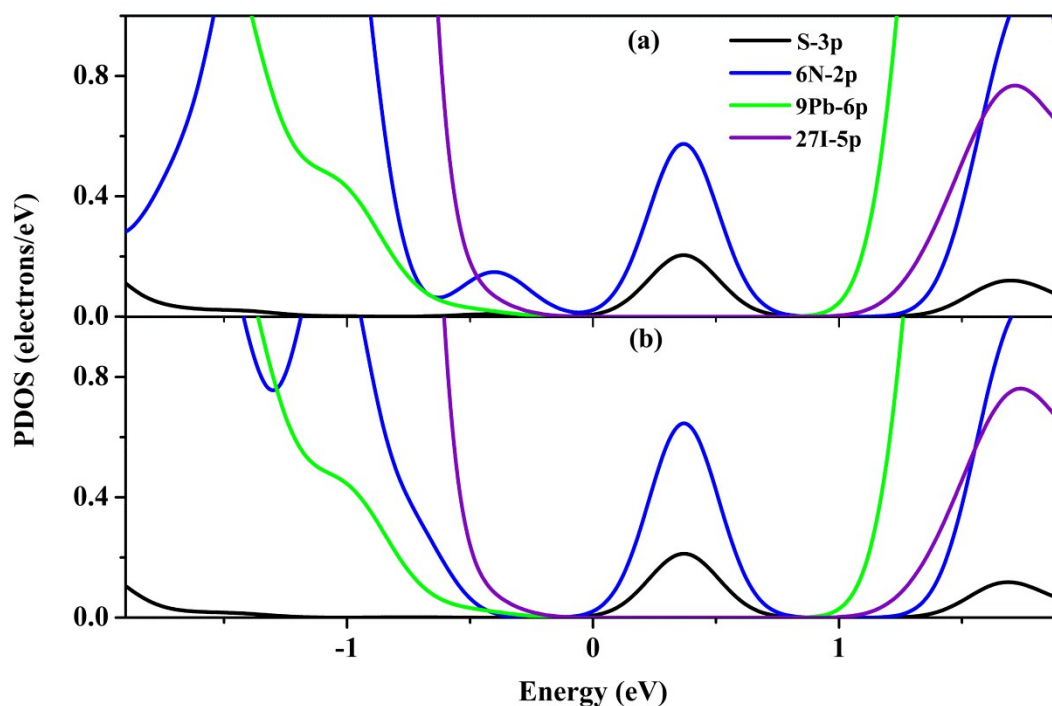

**Fig. S7** The zoomed PDOS of p orbitals of S, N, Pb and I of **TDTP** (a) and **TDTP-II** (b) absorbed on the  $\text{CH}_3\text{NH}_3\text{PbI}_3$  (110) facet.

The optimized geometries of the ground state in Cartesian coordinates:

**TDTP**

|   |           |          |           |
|---|-----------|----------|-----------|
| 6 | 0.736496  | 4.346099 | 0.069366  |
| 6 | 1.441848  | 3.119269 | 0.101356  |
| 6 | 0.722089  | 1.849762 | 0.007249  |
| 6 | -0.721953 | 1.849789 | -0.007243 |
| 6 | -1.441663 | 3.119328 | -0.101317 |
| 6 | -0.736262 | 4.346129 | -0.069290 |
| 7 | 1.357267  | 5.536271 | 0.159568  |
| 6 | 2.679960  | 5.545923 | 0.288250  |
| 6 | 3.469778  | 4.387967 | 0.337994  |
| 6 | 2.838897  | 3.159720 | 0.243620  |
| 6 | -2.838709 | 3.159840 | -0.243586 |
| 6 | -3.469540 | 4.388115 | -0.337926 |
| 6 | -2.679677 | 5.546038 | -0.288145 |

|    |            |           |           |
|----|------------|-----------|-----------|
| 7  | -1.356985  | 5.536329  | -0.159459 |
| 7  | 1.390348   | 0.717415  | -0.051421 |
| 7  | -1.390254  | 0.717463  | 0.051393  |
| 6  | -0.727135  | -0.469841 | 0.066956  |
| 6  | 0.727183   | -0.469863 | -0.067017 |
| 6  | 1.493426   | -1.658049 | -0.190014 |
| 6  | 0.726013   | -2.863191 | -0.101389 |
| 6  | -0.726030  | -2.863169 | 0.101262  |
| 6  | -1.493408  | -1.658012 | 0.189927  |
| 7  | 1.235934   | -4.104659 | -0.183632 |
| 16 | -0.000056  | -5.151588 | -0.000114 |
| 7  | -1.236000  | -4.104619 | 0.183478  |
| 6  | -5.121980  | -2.510170 | 0.635388  |
| 6  | -3.789020  | -2.764620 | 0.239431  |
| 6  | -2.931643  | -1.686349 | 0.404423  |
| 16 | -3.847733  | -0.320228 | 1.053168  |
| 6  | -5.329373  | -1.239919 | 1.121200  |
| 6  | -6.616549  | -0.676770 | 1.663547  |
| 6  | -7.431077  | 0.277124  | 0.738402  |
| 6  | -6.756893  | 1.646329  | 0.515062  |
| 6  | -6.484671  | 2.456023  | 1.788100  |
| 6  | -7.800670  | -0.369824 | -0.610610 |
| 6  | -8.743224  | -1.577778 | -0.525057 |
| 6  | -9.148724  | -2.122250 | -1.901015 |
| 6  | -10.086724 | -3.330274 | -1.822314 |
| 6  | 5.329391   | -1.239851 | -1.121237 |
| 16 | 3.847720   | -0.320210 | -1.053207 |
| 6  | 2.931663   | -1.686373 | -0.404507 |
| 6  | 3.789075   | -2.764616 | -0.239509 |
| 6  | 5.122030   | -2.510116 | -0.635450 |
| 6  | 6.616557   | -0.676665 | -1.663570 |
| 6  | 7.431151   | 0.277104  | -0.738354 |
| 6  | 7.800529   | -0.369918 | 0.610682  |
| 6  | 6.757174   | 1.646419  | -0.515069 |



|   |            |           |           |
|---|------------|-----------|-----------|
| 6 | 6.485156   | 2.456135  | -1.788137 |
| 6 | 8.742792   | -1.578101 | 0.525179  |
| 6 | 9.148095   | -2.122667 | 1.901157  |
| 6 | 10.085804  | -3.330921 | 1.822505  |
| 1 | 3.144680   | 6.528062  | 0.361753  |
| 1 | 4.546118   | 4.460460  | 0.455649  |
| 1 | 3.389744   | 2.227321  | 0.282429  |
| 1 | -3.389593  | 2.227465  | -0.282426 |
| 1 | -4.545877  | 4.460653  | -0.455583 |
| 1 | -3.144357  | 6.528197  | -0.361621 |
| 1 | -5.909661  | -3.254151 | 0.582972  |
| 1 | -3.450569  | -3.717327 | -0.138385 |
| 1 | -7.251295  | -1.532579 | 1.916448  |
| 1 | -6.423781  | -0.162214 | 2.611653  |
| 1 | -8.368559  | 0.469954  | 1.283179  |
| 1 | -7.411271  | 2.233615  | -0.142135 |
| 1 | -5.821937  | 1.505509  | -0.042037 |
| 1 | -6.110555  | 3.455215  | 1.542986  |
| 1 | -7.398164  | 2.581584  | 2.381075  |
| 1 | -5.734369  | 1.983918  | 2.430020  |
| 1 | -6.880630  | -0.661193 | -1.134691 |
| 1 | -8.277597  | 0.396228  | -1.237189 |
| 1 | -8.273935  | -2.387426 | 0.049173  |
| 1 | -9.647993  | -1.295945 | 0.033180  |
| 1 | -9.630266  | -1.321515 | -2.478619 |
| 1 | -8.244113  | -2.396168 | -2.460362 |
| 1 | -10.357417 | -3.692830 | -2.819247 |
| 1 | -9.618844  | -4.161716 | -1.282802 |
| 1 | -11.015164 | -3.078522 | -1.297101 |
| 1 | 3.450656   | -3.717335 | 0.138303  |
| 1 | 5.909737   | -3.254071 | -0.583035 |
| 1 | 6.423784   | -0.162019 | -2.611626 |
| 1 | 7.251271   | -1.532470 | -1.916562 |
| 1 | 8.368708   | 0.469786  | -1.283057 |

|   |           |           |           |
|---|-----------|-----------|-----------|
| 1 | 8.277607  | 0.396024  | 1.237279  |
| 1 | 6.880395  | -0.661066 | 1.134722  |
| 1 | 5.822164  | 1.505756  | 0.041978  |
| 1 | 7.411607  | 2.233610  | 0.142156  |
| 1 | 6.111174  | 3.455388  | -1.543063 |
| 1 | 7.398708  | 2.581551  | -2.381053 |
| 1 | 5.734826  | 1.984134  | -2.430101 |
| 1 | 8.273332  | -2.387638 | -0.049072 |
| 1 | 9.647655  | -1.296490 | -0.033018 |
| 1 | 8.243392  | -2.396364 | 2.460463  |
| 1 | 9.629805  | -1.322048 | 2.478781  |
| 1 | 10.356361 | -3.693540 | 2.819451  |
| 1 | 9.617746  | -4.162250 | 1.282972  |
| 1 | 11.014330 | -3.079398 | 1.297335  |

**TDTP-I**

|   |           |           |           |
|---|-----------|-----------|-----------|
| 6 | 0.739223  | 4.697153  | 0.025559  |
| 6 | 1.446310  | 3.471002  | 0.029098  |
| 6 | 0.723214  | 2.200212  | -0.016777 |
| 6 | -0.723005 | 2.200269  | 0.016737  |
| 6 | -1.445995 | 3.471124  | -0.029088 |
| 6 | -0.738804 | 4.697215  | -0.025498 |
| 7 | 1.362118  | 5.888618  | 0.066297  |
| 6 | 2.690039  | 5.901980  | 0.113873  |
| 6 | 3.483161  | 4.745520  | 0.129598  |
| 6 | 2.849554  | 3.516031  | 0.089670  |
| 6 | -2.849235 | 3.516276  | -0.089663 |
| 6 | -3.482736 | 4.745821  | -0.129540 |
| 6 | -2.689516 | 5.902213  | -0.113766 |
| 7 | -1.361597 | 5.888735  | -0.066188 |
| 7 | 1.388975  | 1.066451  | -0.080361 |
| 7 | -1.388856 | 1.066556  | 0.080281  |
| 6 | -0.726474 | -0.121749 | 0.069684  |
| 6 | 0.726500  | -0.121800 | -0.069804 |

|    |           |           |           |
|----|-----------|-----------|-----------|
| 6  | 1.491484  | -1.311949 | -0.178340 |
| 6  | 0.725863  | -2.516338 | -0.093061 |
| 6  | -0.725993 | -2.516289 | 0.092872  |
| 6  | -1.491535 | -1.311855 | 0.178191  |
| 7  | 1.237567  | -3.757613 | -0.166806 |
| 16 | -0.000149 | -4.804124 | -0.000131 |
| 7  | -1.237789 | -3.757529 | 0.166572  |
| 7  | -5.107350 | -2.214480 | 0.547160  |
| 6  | -3.792513 | -2.419942 | 0.248365  |
| 6  | -2.932531 | -1.337699 | 0.369275  |
| 16 | -3.897087 | 0.037287  | 0.897312  |
| 6  | -5.325941 | -0.976483 | 0.919257  |
| 6  | -6.675225 | -0.447350 | 1.315021  |
| 6  | -7.637150 | -0.088639 | 0.142392  |
| 6  | -7.138543 | 1.098671  | -0.705871 |
| 6  | -6.998821 | 2.426495  | 0.047552  |
| 6  | -7.974854 | -1.292030 | -0.760083 |
| 6  | -8.615055 | -2.492375 | -0.051174 |
| 6  | -9.097098 | -3.572909 | -1.028247 |
| 6  | -9.727377 | -4.780598 | -0.328474 |
| 6  | 5.325912  | -0.976644 | -0.919314 |
| 16 | 3.897066  | 0.037138  | -0.897411 |
| 6  | 2.932481  | -1.337841 | -0.369410 |
| 6  | 3.792449  | -2.420094 | -0.248479 |
| 7  | 5.107297  | -2.214641 | -0.547230 |
| 6  | 6.675215  | -0.447514 | -1.315014 |
| 6  | 7.637080  | -0.088809 | -0.142335 |
| 6  | 7.974632  | -1.292178 | 0.760225  |
| 6  | 7.138487  | 1.098575  | 0.705833  |
| 6  | 6.998892  | 2.426368  | -0.047670 |
| 6  | 8.614771  | -2.492618 | 0.051421  |
| 6  | 9.096652  | -3.573144 | 1.028581  |
| 6  | 9.726876  | -4.780922 | 0.328915  |
| 1  | 3.156208  | 6.885547  | 0.146147  |

|   |            |           |           |
|---|------------|-----------|-----------|
| 1 | 4.564721   | 4.818986  | 0.175700  |
| 1 | 3.407198   | 2.587769  | 0.109444  |
| 1 | -3.406958  | 2.588064  | -0.109478 |
| 1 | -4.564290  | 4.819381  | -0.175642 |
| 1 | -3.155601  | 6.885821  | -0.146001 |
| 1 | -3.471473  | -3.404382 | -0.056045 |
| 1 | -7.148707  | -1.216005 | 1.933251  |
| 1 | -6.548166  | 0.432142  | 1.953826  |
| 1 | -8.571274  | 0.229610  | 0.630937  |
| 1 | -6.180674  | 0.837683  | -1.174266 |
| 1 | -7.846693  | 1.238838  | -1.532178 |
| 1 | -6.740266  | 3.236634  | -0.642800 |
| 1 | -7.936697  | 2.703568  | 0.542780  |
| 1 | -6.218842  | 2.390943  | 0.815622  |
| 1 | -8.660849  | -0.935446 | -1.541195 |
| 1 | -7.067129  | -1.626584 | -1.277406 |
| 1 | -7.890456  | -2.940796 | 0.638452  |
| 1 | -9.466201  | -2.151740 | 0.557496  |
| 1 | -9.822212  | -3.134477 | -1.727842 |
| 1 | -8.248385  | -3.906903 | -1.639886 |
| 1 | -10.060843 | -5.533676 | -1.050025 |
| 1 | -9.012815  | -5.261880 | 0.348643  |
| 1 | -10.597791 | -4.483813 | 0.268090  |
| 1 | 3.471395   | -3.404528 | 0.055934  |
| 1 | 6.548193   | 0.431979  | -1.953825 |
| 1 | 7.148724   | -1.216172 | -1.933219 |
| 1 | 8.571260   | 0.229355  | -0.630828 |
| 1 | 7.066847   | -1.626629 | 1.277511  |
| 1 | 8.660609   | -0.935610 | 1.541359  |
| 1 | 7.846590   | 1.238744  | 1.532180  |
| 1 | 6.180571   | 0.837668  | 1.174178  |
| 1 | 6.740324   | 3.236556  | 0.642621  |
| 1 | 7.936820   | 2.703366  | -0.542840 |
| 1 | 6.218970   | 2.390815  | -0.815798 |

|   |           |           |           |
|---|-----------|-----------|-----------|
| 1 | 7.890178  | -2.941010 | -0.638231 |
| 1 | 9.465988  | -2.152092 | -0.557211 |
| 1 | 8.247868  | -3.907032 | 1.640179  |
| 1 | 9.821756  | -3.134738 | 1.728204  |
| 1 | 10.060227 | -5.533993 | 1.050528  |
| 1 | 9.012319  | -5.262178 | -0.348227 |
| 1 | 10.597356 | -4.484243 | -0.267605 |

**TDTP-II**

|    |           |           |           |
|----|-----------|-----------|-----------|
| 6  | 0.738901  | -4.120413 | -0.047517 |
| 6  | 1.443460  | -2.894031 | -0.083432 |
| 6  | 0.723702  | -1.620688 | -0.027164 |
| 6  | -0.723717 | -1.620689 | 0.027170  |
| 6  | -1.443474 | -2.894033 | 0.083437  |
| 6  | -0.738913 | -4.120414 | 0.047521  |
| 7  | 1.365224  | -5.310313 | -0.094613 |
| 6  | 2.691881  | -5.318071 | -0.177411 |
| 6  | 3.481814  | -4.159391 | -0.217868 |
| 6  | 2.844952  | -2.931591 | -0.170428 |
| 6  | -2.844966 | -2.931595 | 0.170433  |
| 6  | -3.481825 | -4.159395 | 0.217871  |
| 6  | -2.691891 | -5.318074 | 0.177415  |
| 7  | -1.365235 | -5.310315 | 0.094616  |
| 7  | 1.400973  | -0.496006 | -0.022672 |
| 7  | -1.400989 | -0.496008 | 0.022678  |
| 6  | -0.731034 | 0.693983  | -0.014204 |
| 6  | 0.731016  | 0.693984  | 0.014209  |
| 6  | 1.485887  | 1.885913  | 0.049397  |
| 6  | 0.730633  | 3.088344  | 0.024458  |
| 6  | -0.730655 | 3.088343  | -0.024454 |
| 6  | -1.485906 | 1.885911  | -0.049393 |
| 7  | 1.256548  | 4.330685  | 0.051274  |
| 16 | -0.000012 | 5.369199  | 0.000000  |
| 7  | -1.256570 | 4.330684  | -0.051269 |

|   |           |           |           |
|---|-----------|-----------|-----------|
| 6 | -2.964597 | 1.902430  | -0.105105 |
| 6 | 2.964578  | 1.902434  | 0.105108  |
| 6 | -3.709900 | 2.742612  | 0.738772  |
| 6 | -5.101242 | 2.754685  | 0.689357  |
| 6 | -5.810770 | 1.943017  | -0.207532 |
| 6 | -5.060665 | 1.126323  | -1.067837 |
| 6 | -3.670486 | 1.097273  | -1.015792 |
| 6 | -7.325001 | 1.954814  | -0.255388 |
| 6 | -8.047107 | 0.921797  | 0.664568  |
| 6 | -7.795512 | 1.173666  | 2.166026  |
| 6 | -8.369210 | 2.487721  | 2.708560  |
| 6 | -7.728707 | -0.542907 | 0.299305  |
| 6 | -8.245020 | -1.005144 | -1.070102 |
| 6 | -7.955806 | -2.484488 | -1.356920 |
| 6 | -8.482922 | -2.952690 | -2.716528 |
| 6 | 3.709879  | 2.742615  | -0.738773 |
| 6 | 5.101221  | 2.754691  | -0.689359 |
| 6 | 5.810751  | 1.943026  | 0.207530  |
| 6 | 5.060649  | 1.126333  | 1.067839  |
| 6 | 3.670470  | 1.097280  | 1.015795  |
| 6 | 7.324982  | 1.954828  | 0.255383  |
| 6 | 8.047090  | 0.921819  | -0.664581 |
| 6 | 7.795447  | 1.173667  | -2.166034 |
| 6 | 8.369085  | 2.487739  | -2.708592 |
| 6 | 7.728738  | -0.542890 | -0.299295 |
| 6 | 8.245116  | -1.005106 | 1.070095  |
| 6 | 7.955947  | -2.484454 | 1.356935  |
| 6 | 8.483132  | -2.952635 | 2.716524  |
| 1 | 3.161015  | -6.300141 | -0.214865 |
| 1 | 4.562503  | -4.232130 | -0.286398 |
| 1 | 3.392209  | -1.995686 | -0.198436 |
| 1 | -3.392224 | -1.995690 | 0.198441  |
| 1 | -4.562514 | -4.232136 | 0.286401  |
| 1 | -3.161024 | -6.300145 | 0.214868  |

|   |           |           |           |
|---|-----------|-----------|-----------|
| 1 | -3.195203 | 3.387516  | 1.441551  |
| 1 | -5.645321 | 3.417189  | 1.356900  |
| 1 | -5.573051 | 0.511280  | -1.802607 |
| 1 | -3.122255 | 0.459644  | -1.699264 |
| 1 | -7.682601 | 2.956359  | 0.007102  |
| 1 | -7.649782 | 1.782928  | -1.287352 |
| 1 | -9.123728 | 1.073055  | 0.488089  |
| 1 | -8.244167 | 0.344493  | 2.728192  |
| 1 | -6.718211 | 1.126654  | 2.369773  |
| 1 | -8.212727 | 2.563575  | 3.789530  |
| 1 | -7.905925 | 3.368296  | 2.252401  |
| 1 | -9.447979 | 2.553318  | 2.525279  |
| 1 | -6.644483 | -0.707241 | 0.358842  |
| 1 | -8.173456 | -1.189530 | 1.067963  |
| 1 | -9.329690 | -0.832944 | -1.125144 |
| 1 | -7.804726 | -0.398060 | -1.872209 |
| 1 | -6.871516 | -2.656340 | -1.305964 |
| 1 | -8.397616 | -3.099740 | -0.561231 |
| 1 | -8.260799 | -4.010561 | -2.890255 |
| 1 | -9.569286 | -2.825746 | -2.784903 |
| 1 | -8.032681 | -2.380197 | -3.535445 |
| 1 | 3.195179  | 3.387517  | -1.441552 |
| 1 | 5.645298  | 3.417195  | -1.356904 |
| 1 | 5.573036  | 0.511292  | 1.802609  |
| 1 | 3.122241  | 0.459651  | 1.699269  |
| 1 | 7.649768  | 1.782941  | 1.287346  |
| 1 | 7.682577  | 2.956375  | -0.007105 |
| 1 | 9.123712  | 1.073106  | -0.488131 |
| 1 | 6.718142  | 1.126617  | -2.369752 |
| 1 | 8.244117  | 0.344506  | -2.728205 |
| 1 | 8.212571  | 2.563580  | -3.789559 |
| 1 | 7.905781  | 3.368301  | -2.252427 |
| 1 | 9.447857  | 2.553375  | -2.525340 |
| 1 | 8.173472  | -1.189508 | -1.067966 |

|   |          |           |           |
|---|----------|-----------|-----------|
| 1 | 6.644516 | -0.707250 | -0.358788 |
| 1 | 9.329785 | -0.832881 | 1.125091  |
| 1 | 7.804842 | -0.398026 | 1.872215  |
| 1 | 8.397738 | -3.099702 | 0.561231  |
| 1 | 6.871660 | -2.656331 | 1.306026  |
| 1 | 8.261040 | -4.010510 | 2.890267  |
| 1 | 9.569495 | -2.825665 | 2.784852  |
| 1 | 8.032912 | -2.380146 | 3.535456  |

**dimer-TDTP**

|    |           |           |           |
|----|-----------|-----------|-----------|
| 6  | -0.700970 | 4.129740  | -2.673668 |
| 6  | -1.748444 | 3.196807  | -2.577153 |
| 6  | -1.465876 | 1.758188  | -2.542347 |
| 6  | -0.091403 | 1.309438  | -2.577635 |
| 6  | 0.987856  | 2.284794  | -2.756601 |
| 6  | 0.701102  | 3.662349  | -2.804631 |
| 7  | -0.909501 | 5.452923  | -2.639774 |
| 6  | -2.157953 | 5.882525  | -2.527610 |
| 6  | -3.271470 | 5.038666  | -2.441854 |
| 6  | -3.058401 | 3.674632  | -2.458775 |
| 6  | 2.319968  | 1.876166  | -2.879919 |
| 6  | 3.303622  | 2.836289  | -3.033003 |
| 6  | 2.915478  | 4.178568  | -3.055992 |
| 7  | 1.655804  | 4.588512  | -2.952072 |
| 7  | -2.448285 | 0.906973  | -2.463750 |
| 7  | 0.202073  | 0.046474  | -2.470143 |
| 6  | -0.795096 | -0.875053 | -2.335446 |
| 6  | -2.183761 | -0.430762 | -2.367754 |
| 6  | -3.271893 | -1.322740 | -2.273257 |
| 6  | -2.898814 | -2.695133 | -2.178174 |
| 6  | -1.516675 | -3.137388 | -2.183455 |
| 6  | -0.421260 | -2.229403 | -2.218480 |
| 7  | -3.759693 | -3.718348 | -2.098718 |
| 16 | -2.892193 | -5.077675 | -2.054477 |



|    |            |           |           |
|----|------------|-----------|-----------|
| 7  | -1.403135  | -4.468212 | -2.122269 |
| 6  | 3.282940   | -2.753403 | -1.855937 |
| 6  | 2.095764   | -1.985050 | -1.798428 |
| 6  | 0.956899   | -2.692846 | -2.140463 |
| 16 | 1.393081   | -4.346418 | -2.503675 |
| 6  | 3.069184   | -4.050518 | -2.251322 |
| 6  | 4.060249   | -5.164238 | -2.441631 |
| 6  | 4.552922   | -5.807751 | -1.126319 |
| 6  | 5.371928   | -4.829130 | -0.279555 |
| 6  | 6.597871   | -4.240165 | -0.974291 |
| 6  | 3.374429   | -6.388584 | -0.334211 |
| 6  | 3.763600   | -7.293812 | 0.832487  |
| 6  | 2.544199   | -7.790306 | 1.605804  |
| 6  | 2.930467   | -8.607830 | 2.834901  |
| 6  | -7.168507  | -0.783353 | -1.921595 |
| 16 | -5.934876  | -1.962379 | -1.653153 |
| 6  | -4.675378  | -0.913845 | -2.273781 |
| 6  | -5.238408  | 0.276409  | -2.690778 |
| 6  | -6.640201  | 0.343998  | -2.493885 |
| 6  | -8.613516  | -1.071550 | -1.612432 |
| 6  | -9.042934  | -0.811144 | -0.147827 |
| 6  | -8.851521  | 0.671306  | 0.203482  |
| 6  | -8.312864  | -1.791612 | 0.782103  |
| 6  | -8.764666  | -1.840074 | 2.241762  |
| 6  | -9.717917  | 1.213227  | 1.340800  |
| 6  | -9.431311  | 2.684700  | 1.633811  |
| 6  | -10.262952 | 3.226282  | 2.792093  |
| 1  | -2.289313  | 6.962364  | -2.499365 |
| 1  | -4.268096  | 5.454639  | -2.344792 |
| 1  | -3.868117  | 2.962306  | -2.339718 |
| 1  | 2.550498   | 0.815379  | -2.857812 |
| 1  | 4.350966   | 2.565636  | -3.112976 |
| 1  | 3.664564   | 4.960528  | -3.158092 |
| 1  | 4.265237   | -2.354977 | -1.624440 |

|   |            |           |           |
|---|------------|-----------|-----------|
| 1 | 2.067447   | -0.941016 | -1.521483 |
| 1 | 3.605623   | -5.946617 | -3.059595 |
| 1 | 4.913153   | -4.779487 | -3.010615 |
| 1 | 5.215489   | -6.636271 | -1.422281 |
| 1 | 5.703461   | -5.346991 | 0.626281  |
| 1 | 4.709792   | -4.021233 | 0.058095  |
| 1 | 6.330253   | -3.595078 | -1.816950 |
| 1 | 7.184163   | -3.635628 | -0.276057 |
| 1 | 7.250043   | -5.030806 | -1.360713 |
| 1 | 2.728647   | -6.957175 | -1.019633 |
| 1 | 2.754834   | -5.568287 | 0.054312  |
| 1 | 4.353588   | -8.146746 | 0.465849  |
| 1 | 4.409970   | -6.746951 | 1.530193  |
| 1 | 1.952829   | -6.917859 | 1.906198  |
| 1 | 1.914379   | -8.394453 | 0.939147  |
| 1 | 2.049697   | -8.968313 | 3.373304  |
| 1 | 3.537215   | -9.478251 | 2.562583  |
| 1 | 3.517096   | -7.998088 | 3.530626  |
| 1 | -4.652555  | 1.061482  | -3.142130 |
| 1 | -7.248806  | 1.193016  | -2.785877 |
| 1 | -8.839753  | -2.113022 | -1.869168 |
| 1 | -9.221334  | -0.444139 | -2.273703 |
| 1 | -10.119473 | -1.037191 | -0.102519 |
| 1 | -7.792428  | 0.850216  | 0.426560  |
| 1 | -9.066487  | 1.273819  | -0.691299 |
| 1 | -8.422407  | -2.796825 | 0.353014  |
| 1 | -7.240128  | -1.567492 | 0.747183  |
| 1 | -8.414138  | -0.975686 | 2.812776  |
| 1 | -9.856017  | -1.878975 | 2.324086  |
| 1 | -8.360608  | -2.730875 | 2.731108  |
| 1 | -10.778713 | 1.091282  | 1.080370  |
| 1 | -9.564678  | 0.637636  | 2.259764  |
| 1 | -9.614618  | 3.279154  | 0.729532  |
| 1 | -8.363052  | 2.798026  | 1.865412  |

|    |            |           |           |
|----|------------|-----------|-----------|
| 1  | -10.043245 | 4.278621  | 2.991513  |
| 1  | -11.333582 | 3.139595  | 2.581116  |
| 1  | -10.059696 | 2.662797  | 3.709401  |
| 6  | 1.110723   | -3.508235 | 1.562212  |
| 6  | 0.362847   | -2.368951 | 1.211816  |
| 6  | 1.011703   | -1.061417 | 1.107197  |
| 6  | 2.445332   | -0.971392 | 1.268043  |
| 6  | 3.183583   | -2.128460 | 1.779376  |
| 6  | 2.537394   | -3.366836 | 1.944180  |
| 7  | 0.573217   | -4.733648 | 1.604693  |
| 6  | -0.717995  | -4.860811 | 1.329886  |
| 6  | -1.557967  | -3.785328 | 1.019804  |
| 6  | -1.002491  | -2.522185 | 0.946468  |
| 6  | 4.522469   | -2.010565 | 2.170766  |
| 6  | 5.147672   | -3.105936 | 2.734692  |
| 6  | 4.411402   | -4.288370 | 2.872424  |
| 7  | 3.152751   | -4.430898 | 2.479428  |
| 7  | 0.305477   | 0.009504  | 0.874079  |
| 7  | 3.081325   | 0.134277  | 1.005789  |
| 6  | 2.376654   | 1.252051  | 0.660270  |
| 6  | 0.925176   | 1.215888  | 0.721266  |
| 6  | 0.117826   | 2.368049  | 0.624367  |
| 6  | 0.850010   | 3.576606  | 0.410040  |
| 6  | 2.291726   | 3.588147  | 0.228681  |
| 6  | 3.089467   | 2.416005  | 0.313414  |
| 7  | 0.323045   | 4.805834  | 0.304655  |
| 16 | 1.523747   | 5.830302  | 0.000976  |
| 7  | 2.773732   | 4.819053  | 0.002994  |
| 6  | 6.641157   | 1.681107  | -0.624391 |
| 6  | 5.292364   | 1.340185  | -0.362097 |
| 6  | 4.515849   | 2.414179  | 0.026744  |
| 16 | 5.486933   | 3.867867  | 0.032308  |
| 6  | 6.912120   | 3.011636  | -0.436376 |
| 6  | 8.232256   | 3.708940  | -0.605405 |

|    |           |           |           |
|----|-----------|-----------|-----------|
| 6  | 9.108117  | 3.759040  | 0.668874  |
| 6  | 8.467663  | 4.569604  | 1.801963  |
| 6  | 8.093991  | 5.999633  | 1.414921  |
| 6  | 9.490131  | 2.344295  | 1.119054  |
| 6  | 10.530491 | 2.284646  | 2.236833  |
| 6  | 11.007532 | 0.860095  | 2.515135  |
| 6  | 12.032491 | 0.792019  | 3.643413  |
| 6  | -3.784248 | 1.768299  | 0.801468  |
| 16 | -2.295964 | 0.895430  | 0.848286  |
| 6  | -1.337182 | 2.358267  | 0.723594  |
| 6  | -2.181078 | 3.453057  | 0.696976  |
| 6  | -3.555271 | 3.117093  | 0.739039  |
| 6  | -5.108504 | 1.064112  | 0.817596  |
| 6  | -5.622013 | 0.661947  | 2.216145  |
| 6  | -5.862911 | 1.897173  | 3.093830  |
| 6  | -4.723925 | -0.366643 | 2.915737  |
| 6  | -4.503345 | -1.657684 | 2.127043  |
| 6  | -6.876308 | 1.668196  | 4.213559  |
| 6  | -7.194066 | 2.937191  | 5.001993  |
| 6  | -8.141104 | 2.681507  | 6.170587  |
| 1  | -1.112980 | -5.874275 | 1.360265  |
| 1  | -2.614425 | -3.944885 | 0.821752  |
| 1  | -1.592304 | -1.651626 | 0.674500  |
| 1  | 5.023013  | -1.055567 | 2.042734  |
| 1  | 6.177474  | -3.059731 | 3.070973  |
| 1  | 4.871070  | -5.167919 | 3.320603  |
| 1  | 7.392694  | 0.971046  | -0.952321 |
| 1  | 4.889460  | 0.342842  | -0.467752 |
| 1  | 8.791397  | 3.175772  | -1.382964 |
| 1  | 8.072810  | 4.725230  | -0.980228 |
| 1  | 10.033136 | 4.278333  | 0.373458  |
| 1  | 9.172876  | 4.608898  | 2.639015  |
| 1  | 7.580900  | 4.037386  | 2.170576  |
| 1  | 8.948686  | 6.518627  | 0.967155  |

|                     |           |           |           |
|---------------------|-----------|-----------|-----------|
| 1                   | 7.270405  | 6.031642  | 0.695617  |
| 1                   | 7.777905  | 6.570108  | 2.291664  |
| 1                   | 9.880062  | 1.794207  | 0.249864  |
| 1                   | 8.584246  | 1.810093  | 1.436105  |
| 1                   | 11.394263 | 2.910667  | 1.971175  |
| 1                   | 10.118050 | 2.704531  | 3.162495  |
| 1                   | 10.140693 | 0.234461  | 2.762820  |
| 1                   | 11.437510 | 0.438770  | 1.597761  |
| 1                   | 12.364900 | -0.233343 | 3.824949  |
| 1                   | 12.915161 | 1.393293  | 3.403959  |
| 1                   | 11.612237 | 1.178760  | 4.577019  |
| 1                   | -1.816873 | 4.465780  | 0.609687  |
| 1                   | -4.354583 | 3.849446  | 0.693965  |
| 1                   | -5.072798 | 0.183953  | 0.165115  |
| 1                   | -5.839060 | 1.744398  | 0.362774  |
| 1                   | -6.598074 | 0.182420  | 2.045745  |
| 1                   | -4.908415 | 2.241641  | 3.515087  |
| 1                   | -6.222795 | 2.722453  | 2.462203  |
| 1                   | -3.756366 | 0.098075  | 3.141259  |
| 1                   | -5.174205 | -0.619094 | 3.883206  |
| 1                   | -4.026250 | -1.475575 | 1.155695  |
| 1                   | -3.860372 | -2.345331 | 2.684210  |
| 1                   | -5.452958 | -2.167162 | 1.929247  |
| 1                   | -7.809481 | 1.277305  | 3.777989  |
| 1                   | -6.512409 | 0.895325  | 4.903271  |
| 1                   | -7.633571 | 3.678334  | 4.320661  |
| 1                   | -6.259593 | 3.376320  | 5.373198  |
| 1                   | -9.079956 | 2.236145  | 5.825178  |
| 1                   | -7.694035 | 1.987059  | 6.888854  |
| 1                   | -8.384613 | 3.604665  | 6.702586  |
| <b>dimer-TDTP-I</b> |           |           |           |
| 6                   | 3.994449  | -1.677025 | -4.605539 |
| 6                   | 4.603608  | -1.453581 | -3.356614 |

|    |           |           |           |
|----|-----------|-----------|-----------|
| 6  | 3.878590  | -1.726743 | -2.112753 |
| 6  | 2.522052  | -2.235257 | -2.181621 |
| 6  | 1.904551  | -2.475503 | -3.487766 |
| 6  | 2.611330  | -2.210509 | -4.673448 |
| 7  | 4.618111  | -1.425304 | -5.763613 |
| 6  | 5.851986  | -0.944159 | -5.716222 |
| 6  | 6.547956  | -0.690527 | -4.528235 |
| 6  | 5.912693  | -0.956155 | -3.331435 |
| 6  | 0.600057  | -2.976016 | -3.580693 |
| 6  | 0.061545  | -3.195208 | -4.832775 |
| 6  | 0.848750  | -2.898820 | -5.952495 |
| 7  | 2.083075  | -2.420422 | -5.886296 |
| 7  | 4.456072  | -1.505820 | -0.964728 |
| 7  | 1.842951  | -2.488601 | -1.100113 |
| 6  | 2.415411  | -2.258184 | 0.117599  |
| 6  | 3.770853  | -1.747695 | 0.192601  |
| 6  | 4.409109  | -1.470195 | 1.413321  |
| 6  | 3.613479  | -1.689619 | 2.573827  |
| 6  | 2.268307  | -2.230935 | 2.495902  |
| 6  | 1.658351  | -2.551121 | 1.257110  |
| 7  | 3.980403  | -1.411488 | 3.830193  |
| 16 | 2.731831  | -1.778703 | 4.782495  |
| 7  | 1.676464  | -2.331668 | 3.693817  |
| 7  | -1.452070 | -4.521678 | 1.829519  |
| 6  | -0.163115 | -4.120450 | 2.043433  |
| 6  | 0.327019  | -3.146672 | 1.212797  |
| 16 | -0.924942 | -2.705049 | 0.092773  |
| 6  | -1.996905 | -3.851598 | 0.854459  |
| 6  | -3.406322 | -4.061668 | 0.385918  |
| 6  | -3.547839 | -5.007216 | -0.828867 |
| 6  | -2.915903 | -4.454969 | -2.114296 |
| 6  | -3.365075 | -3.042133 | -2.485517 |
| 6  | -3.013921 | -6.401855 | -0.481602 |
| 6  | -3.274040 | -7.466893 | -1.546149 |

|    |           |           |           |
|----|-----------|-----------|-----------|
| 6  | -2.896955 | -8.870146 | -1.074490 |
| 6  | -3.124983 | -9.930905 | -2.147714 |
| 6  | 8.150279  | -0.372040 | 1.292207  |
| 16 | 7.000117  | -1.202878 | 0.294638  |
| 6  | 5.774525  | -0.966718 | 1.513653  |
| 6  | 6.355408  | -0.289809 | 2.563948  |
| 7  | 7.669121  | 0.057314  | 2.426064  |
| 6  | 9.556344  | -0.103807 | 0.847208  |
| 6  | 9.690310  | 0.998422  | -0.230190 |
| 6  | 8.998297  | 2.284135  | 0.240623  |
| 6  | 9.206987  | 0.573520  | -1.626921 |
| 6  | 9.716469  | -0.789772 | -2.092776 |
| 6  | 9.259764  | 3.513753  | -0.626334 |
| 6  | 8.557125  | 4.757227  | -0.084818 |
| 6  | 8.849968  | 6.014271  | -0.897736 |
| 1  | 6.322281  | -0.747401 | -6.677442 |
| 1  | 7.556210  | -0.291785 | -4.554817 |
| 1  | 6.392028  | -0.783793 | -2.372724 |
| 1  | 0.048264  | -3.179851 | -2.667698 |
| 1  | -0.940998 | -3.590865 | -4.954232 |
| 1  | 0.454183  | -3.058913 | -6.953691 |
| 1  | 0.412157  | -4.571378 | 2.843012  |
| 1  | -3.947587 | -4.492416 | 1.235645  |
| 1  | -3.869453 | -3.093187 | 0.162891  |
| 1  | -4.630643 | -5.091771 | -1.007179 |
| 1  | -1.821623 | -4.492711 | -2.021648 |
| 1  | -3.172819 | -5.130659 | -2.937384 |
| 1  | -2.985561 | -2.752298 | -3.469338 |
| 1  | -4.457988 | -2.975996 | -2.516607 |
| 1  | -3.010812 | -2.290688 | -1.772841 |
| 1  | -1.934647 | -6.336607 | -0.287340 |
| 1  | -3.467260 | -6.723380 | 0.465392  |
| 1  | -4.336034 | -7.453157 | -1.831349 |
| 1  | -2.707208 | -7.239456 | -2.457927 |

|   |           |            |           |
|---|-----------|------------|-----------|
| 1 | -1.843838 | -8.873523  | -0.766780 |
| 1 | -3.478429 | -9.117423  | -0.177942 |
| 1 | -2.851782 | -10.928155 | -1.793545 |
| 1 | -4.176433 | -9.958816  | -2.451030 |
| 1 | -2.529040 | -9.716833  | -3.040632 |
| 1 | 5.837066  | -0.033303  | 3.476683  |
| 1 | 10.025970 | -1.029583  | 0.499739  |
| 1 | 10.090602 | 0.217145   | 1.745900  |
| 1 | 10.769956 | 1.195917   | -0.310153 |
| 1 | 9.308177  | 2.498500   | 1.272521  |
| 1 | 7.913524  | 2.107161   | 0.288618  |
| 1 | 9.536370  | 1.334980   | -2.342153 |
| 1 | 8.109119  | 0.593354   | -1.655167 |
| 1 | 9.485036  | -0.957722  | -3.148053 |
| 1 | 10.803204 | -0.864584  | -1.976522 |
| 1 | 9.265370  | -1.614142  | -1.531162 |
| 1 | 10.341522 | 3.698779   | -0.690329 |
| 1 | 8.913442  | 3.337050   | -1.652834 |
| 1 | 8.853105  | 4.914946   | 0.961119  |
| 1 | 7.474940  | 4.568037   | -0.069994 |
| 1 | 9.923178  | 6.228846   | -0.911510 |
| 1 | 8.521480  | 5.895551   | -1.935086 |
| 1 | 8.340343  | 6.888025   | -0.481315 |
| 6 | -4.051101 | -2.492037  | 3.273044  |
| 6 | -3.023343 | -1.565111  | 3.022385  |
| 6 | -3.239832 | -0.451706  | 2.098047  |
| 6 | -4.539538 | -0.266870  | 1.484049  |
| 6 | -5.603472 | -1.237551  | 1.755116  |
| 6 | -5.367670 | -2.334100  | 2.605764  |
| 7 | -3.895028 | -3.533441  | 4.097680  |
| 6 | -2.721090 | -3.677765  | 4.697742  |
| 6 | -1.638860 | -2.807846  | 4.523179  |
| 6 | -1.791752 | -1.736962  | 3.665988  |
| 6 | -6.868260 | -1.104510  | 1.168939  |



|    |            |           |           |
|----|------------|-----------|-----------|
| 6  | -7.827439  | -2.063121 | 1.428775  |
| 6  | -7.484478  | -3.129322 | 2.268363  |
| 7  | -6.298969  | -3.266765 | 2.845615  |
| 7  | -2.258117  | 0.366135  | 1.847916  |
| 7  | -4.773045  | 0.752952  | 0.705776  |
| 6  | -3.778079  | 1.654681  | 0.454092  |
| 6  | -2.458151  | 1.426626  | 1.015293  |
| 6  | -1.368841  | 2.273668  | 0.750064  |
| 6  | -1.677278  | 3.426397  | -0.017868 |
| 6  | -3.005625  | 3.678255  | -0.548068 |
| 6  | -4.085144  | 2.771795  | -0.342808 |
| 7  | -0.798667  | 4.383966  | -0.342779 |
| 16 | -1.592920  | 5.475786  | -1.222468 |
| 7  | -3.063699  | 4.817586  | -1.252495 |
| 7  | -7.158759  | 4.167325  | -1.942650 |
| 6  | -5.910336  | 4.205315  | -1.389789 |
| 6  | -5.394832  | 3.011687  | -0.935038 |
| 16 | -6.578697  | 1.770157  | -1.240443 |
| 6  | -7.631948  | 2.951615  | -1.948203 |
| 6  | -8.996584  | 2.588268  | -2.452425 |
| 6  | -10.099479 | 2.610463  | -1.366717 |
| 6  | -9.906050  | 1.480911  | -0.344206 |
| 6  | -11.127110 | 1.231071  | 0.539225  |
| 6  | -10.217237 | 3.979565  | -0.687233 |
| 6  | -10.423805 | 5.153603  | -1.643501 |
| 6  | -10.757628 | 6.450415  | -0.908438 |
| 6  | -10.903868 | 7.638990  | -1.854087 |
| 6  | 2.327310   | 1.939887  | 1.930566  |
| 16 | 1.206811   | 3.188693  | 1.492346  |
| 6  | -0.016671  | 1.978441  | 1.201439  |
| 6  | 0.538607   | 0.744280  | 1.446809  |
| 7  | 1.843042   | 0.729664  | 1.843462  |
| 6  | 3.760470   | 2.195515  | 2.283711  |
| 6  | 4.653398   | 2.613524  | 1.084746  |

|   |            |           |           |
|---|------------|-----------|-----------|
| 6 | 4.721551   | 4.136313  | 0.920419  |
| 6 | 4.215646   | 1.925833  | -0.216412 |
| 6 | 5.322657   | 1.851282  | -1.262372 |
| 6 | 5.553767   | 4.845674  | 1.987251  |
| 6 | 5.735548   | 6.334976  | 1.702451  |
| 6 | 6.646154   | 7.020209  | 2.716752  |
| 1 | -2.628376  | -4.539205 | 5.355486  |
| 1 | -0.691776  | -2.988731 | 5.018617  |
| 1 | -0.983032  | -1.037839 | 3.474746  |
| 1 | -7.066284  | -0.252897 | 0.526275  |
| 1 | -8.819539  | -2.000124 | 0.995449  |
| 1 | -8.211772  | -3.909315 | 2.484642  |
| 1 | -5.385861  | 5.148093  | -1.333665 |
| 1 | -9.241040  | 3.301955  | -3.243829 |
| 1 | -8.967817  | 1.591412  | -2.906390 |
| 1 | -11.041550 | 2.415389  | -1.901543 |
| 1 | -9.659357  | 0.554248  | -0.882019 |
| 1 | -9.039725  | 1.711115  | 0.288550  |
| 1 | -10.962265 | 0.376395  | 1.200899  |
| 1 | -11.352376 | 2.093504  | 1.171330  |
| 1 | -12.013240 | 1.019849  | -0.067999 |
| 1 | -11.056701 | 3.948451  | 0.018548  |
| 1 | -9.313355  | 4.161298  | -0.088753 |
| 1 | -9.513482  | 5.306547  | -2.234987 |
| 1 | -11.233604 | 4.917976  | -2.349970 |
| 1 | -11.683529 | 6.316364  | -0.334576 |
| 1 | -9.967727  | 6.656590  | -0.175261 |
| 1 | -11.151683 | 8.556327  | -1.313642 |
| 1 | -9.974336  | 7.813098  | -2.404622 |
| 1 | -11.695012 | 7.458526  | -2.588968 |
| 1 | 0.008496   | -0.191698 | 1.329589  |
| 1 | 4.117260   | 1.244503  | 2.688493  |
| 1 | 3.830913   | 2.941014  | 3.083172  |
| 1 | 5.667631   | 2.257493  | 1.327605  |

|   |          |          |           |
|---|----------|----------|-----------|
| 1 | 3.702179 | 4.550978 | 0.898777  |
| 1 | 5.151829 | 4.368227 | -0.063280 |
| 1 | 3.347467 | 2.459899 | -0.625741 |
| 1 | 3.870697 | 0.910819 | 0.009156  |
| 1 | 4.947557 | 1.445194 | -2.206432 |
| 1 | 5.763925 | 2.832380 | -1.472709 |
| 1 | 6.122926 | 1.192105 | -0.910359 |
| 1 | 5.098130 | 4.722958 | 2.978887  |
| 1 | 6.541465 | 4.366524 | 2.045991  |
| 1 | 4.753665 | 6.824662 | 1.688938  |
| 1 | 6.151961 | 6.457265 | 0.693470  |
| 1 | 7.645319 | 6.571954 | 2.704401  |
| 1 | 6.754702 | 8.087280 | 2.505954  |
| 1 | 6.249803 | 6.916428 | 3.731757  |

**dimer-TDTP-II**

|   |          |           |           |
|---|----------|-----------|-----------|
| 6 | 2.828196 | -0.873303 | 3.753262  |
| 6 | 2.084995 | -1.850737 | 3.071377  |
| 6 | 2.477205 | -2.283239 | 1.727886  |
| 6 | 3.660925 | -1.714203 | 1.113239  |
| 6 | 4.453363 | -0.730085 | 1.856018  |
| 6 | 4.054691 | -0.308535 | 3.136473  |
| 7 | 2.471159 | -0.415845 | 4.961958  |
| 6 | 1.380132 | -0.918081 | 5.522236  |
| 6 | 0.586124 | -1.912481 | 4.937592  |
| 6 | 0.950783 | -2.386327 | 3.693200  |
| 6 | 5.612702 | -0.180796 | 1.297322  |
| 6 | 6.327416 | 0.746820  | 2.029819  |
| 6 | 5.850266 | 1.094690  | 3.297837  |
| 7 | 4.747672 | 0.595480  | 3.840907  |
| 7 | 1.748613 | -3.160088 | 1.102744  |
| 7 | 4.029511 | -2.053279 | -0.086808 |
| 6 | 3.271653 | -2.950642 | -0.791525 |
| 6 | 2.100330 | -3.543014 | -0.165989 |

|    |           |           |           |
|----|-----------|-----------|-----------|
| 6  | 1.285312  | -4.467821 | -0.828980 |
| 6  | 1.674855  | -4.795827 | -2.150626 |
| 6  | 2.850989  | -4.214124 | -2.771534 |
| 6  | 3.664393  | -3.267146 | -2.097927 |
| 7  | 1.030777  | -5.655778 | -2.956833 |
| 16 | 1.851578  | -5.690976 | -4.344093 |
| 7  | 3.042898  | -4.653396 | -4.026668 |
| 6  | 4.844036  | -2.660193 | -2.748255 |
| 6  | 0.058061  | -5.018883 | -0.217824 |
| 6  | 5.755704  | -3.454191 | -3.452131 |
| 6  | 6.888170  | -2.889819 | -4.028283 |
| 6  | 7.143324  | -1.519605 | -3.933946 |
| 6  | 6.203858  | -0.725044 | -3.267665 |
| 6  | 5.077522  | -1.280445 | -2.677962 |
| 6  | 8.410465  | -0.915056 | -4.486846 |
| 6  | 9.600715  | -0.950053 | -3.492687 |
| 6  | 10.107800 | -2.375920 | -3.237170 |
| 6  | 10.640877 | -3.095770 | -4.474164 |
| 6  | 9.265112  | -0.272988 | -2.158430 |
| 6  | 8.985273  | 1.228527  | -2.232008 |
| 6  | 8.366749  | 1.759537  | -0.940287 |
| 6  | 8.147952  | 3.269177  | -0.949684 |
| 6  | -1.158869 | -4.962258 | -0.906997 |
| 6  | -2.343101 | -5.347186 | -0.285787 |
| 6  | -2.348032 | -5.827837 | 1.026756  |
| 6  | -1.119272 | -5.926315 | 1.691846  |
| 6  | 0.063430  | -5.522955 | 1.087734  |
| 6  | -3.630794 | -6.230555 | 1.714510  |
| 6  | -4.337146 | -5.095024 | 2.497430  |
| 6  | -4.934078 | -4.049241 | 1.544357  |
| 6  | -5.866916 | -3.055908 | 2.240806  |
| 6  | -3.426125 | -4.457567 | 3.553446  |
| 6  | -3.023297 | -5.391449 | 4.694895  |
| 6  | -1.969881 | -4.776310 | 5.613389  |

|   |           |           |           |
|---|-----------|-----------|-----------|
| 6 | -1.601603 | -5.680185 | 6.786066  |
| 1 | 1.117395  | -0.513990 | 6.497784  |
| 1 | -0.289588 | -2.291881 | 5.452628  |
| 1 | 0.387174  | -3.163744 | 3.183018  |
| 1 | 5.920744  | -0.502618 | 0.306081  |
| 1 | 7.235783  | 1.194140  | 1.641281  |
| 1 | 6.390186  | 1.822404  | 3.900996  |
| 1 | 5.580385  | -4.521054 | -3.537365 |
| 1 | 7.589323  | -3.527255 | -4.561277 |
| 1 | 6.359447  | 0.349610  | -3.208886 |
| 1 | 4.366691  | -0.644285 | -2.162608 |
| 1 | 8.700593  | -1.438405 | -5.403814 |
| 1 | 8.216647  | 0.122844  | -4.775981 |
| 1 | 10.418767 | -0.387318 | -3.968704 |
| 1 | 10.910090 | -2.318250 | -2.491624 |
| 1 | 9.305659  | -2.965260 | -2.774117 |
| 1 | 9.855759  | -3.304018 | -5.206833 |
| 1 | 11.406245 | -2.494036 | -4.975721 |
| 1 | 11.093796 | -4.052969 | -4.203121 |
| 1 | 8.399462  | -0.783203 | -1.713531 |
| 1 | 10.099498 | -0.435088 | -1.463676 |
| 1 | 9.918131  | 1.767015  | -2.446843 |
| 1 | 8.307397  | 1.460260  | -3.063188 |
| 1 | 7.405897  | 1.249603  | -0.782493 |
| 1 | 9.008310  | 1.479657  | -0.093580 |
| 1 | 7.670219  | 3.612212  | -0.027326 |
| 1 | 9.097884  | 3.801969  | -1.055297 |
| 1 | 7.507400  | 3.563690  | -1.786910 |
| 1 | -1.181315 | -4.579327 | -1.921917 |
| 1 | -3.281044 | -5.268503 | -0.829257 |
| 1 | -1.089771 | -6.328000 | 2.701987  |
| 1 | 1.001017  | -5.589413 | 1.628721  |
| 1 | -3.419211 | -7.060276 | 2.396978  |
| 1 | -4.334833 | -6.615954 | 0.968127  |

|   |           |           |           |
|---|-----------|-----------|-----------|
| 1 | -5.179321 | -5.570236 | 3.024570  |
| 1 | -5.496904 | -4.576726 | 0.762669  |
| 1 | -4.127814 | -3.510400 | 1.028066  |
| 1 | -5.318391 | -2.348470 | 2.868788  |
| 1 | -6.436470 | -2.466432 | 1.516638  |
| 1 | -6.587720 | -3.579420 | 2.878522  |
| 1 | -3.929320 | -3.587703 | 3.991827  |
| 1 | -2.524139 | -4.069338 | 3.057858  |
| 1 | -3.914699 | -5.653190 | 5.281120  |
| 1 | -2.633538 | -6.339693 | 4.303940  |
| 1 | -2.337737 | -3.811508 | 5.987784  |
| 1 | -1.071062 | -4.557511 | 5.019634  |
| 1 | -0.841089 | -5.223314 | 7.424512  |
| 1 | -2.478619 | -5.891618 | 7.405506  |
| 1 | -1.209224 | -6.637875 | 6.430003  |
| 6 | -2.944833 | 6.811461  | -1.355291 |
| 6 | -2.047436 | 5.923148  | -0.736623 |
| 6 | -2.310762 | 4.480965  | -0.728802 |
| 6 | -3.517591 | 3.973018  | -1.348001 |
| 6 | -4.450431 | 4.910814  | -1.980031 |
| 6 | -4.178297 | 6.290714  | -1.997061 |
| 7 | -2.736032 | 8.134280  | -1.389410 |
| 6 | -1.640994 | 8.605774  | -0.810298 |
| 6 | -0.688291 | 7.807345  | -0.165452 |
| 6 | -0.896737 | 6.442475  | -0.131235 |
| 6 | -5.625704 | 4.450098  | -2.584832 |
| 6 | -6.469098 | 5.367267  | -3.180056 |
| 6 | -6.105712 | 6.719011  | -3.145703 |
| 7 | -5.000712 | 7.176535  | -2.574685 |
| 7 | -1.461363 | 3.682831  | -0.151053 |
| 7 | -3.795779 | 2.701598  | -1.343979 |
| 6 | -2.919941 | 1.826511  | -0.759984 |
| 6 | -1.705168 | 2.336386  | -0.143025 |
| 6 | -0.777937 | 1.502468  | 0.499595  |

|    |            |           |           |
|----|------------|-----------|-----------|
| 6  | -1.123072  | 0.130431  | 0.541611  |
| 6  | -2.335789  | -0.378508 | -0.071564 |
| 6  | -3.250485  | 0.463844  | -0.751975 |
| 7  | -0.381474  | -0.839381 | 1.105633  |
| 16 | -1.163873  | -2.229163 | 0.870269  |
| 7  | -2.453841  | -1.712488 | 0.058906  |
| 6  | -4.471228  | -0.081404 | -1.381991 |
| 6  | 0.462740   | 2.022795  | 1.111977  |
| 6  | -4.915612  | 0.355980  | -2.636804 |
| 6  | -6.073863  | -0.166277 | -3.198634 |
| 6  | -6.829744  | -1.140555 | -2.539604 |
| 6  | -6.362947  | -1.598178 | -1.303886 |
| 6  | -5.210126  | -1.077770 | -0.731809 |
| 6  | -8.119564  | -1.655916 | -3.130074 |
| 6  | -9.382733  | -0.914358 | -2.627074 |
| 6  | -9.370898  | 0.574050  | -2.998813 |
| 6  | -9.444793  | 0.844477  | -4.500347 |
| 6  | -9.582303  | -1.113983 | -1.116979 |
| 6  | -11.008544 | -0.847504 | -0.633644 |
| 6  | -11.150539 | -0.880806 | 0.890227  |
| 6  | -10.743194 | -2.214461 | 1.514602  |
| 6  | 0.855523   | 1.635502  | 2.399481  |
| 6  | 1.962770   | 2.221322  | 3.006848  |
| 6  | 2.728306   | 3.183543  | 2.342833  |
| 6  | 2.377668   | 3.507263  | 1.027209  |
| 6  | 1.260295   | 2.947933  | 0.424548  |
| 6  | 3.863873   | 3.886857  | 3.044547  |
| 6  | 3.450963   | 5.214076  | 3.730281  |
| 6  | 2.466034   | 4.941503  | 4.876289  |
| 6  | 2.252090   | 6.127652  | 5.815280  |
| 6  | 2.895241   | 6.249543  | 2.745560  |
| 6  | 3.888379   | 6.734326  | 1.689906  |
| 6  | 3.240809   | 7.644896  | 0.648863  |
| 6  | 4.237673   | 8.175958  | -0.377185 |

|   |            |           |           |
|---|------------|-----------|-----------|
| 1 | -1.505965  | 9.684474  | -0.857076 |
| 1 | 0.186415   | 8.255663  | 0.293101  |
| 1 | -0.202676  | 5.758034  | 0.349476  |
| 1 | -5.842223  | 3.385941  | -2.567021 |
| 1 | -7.390552  | 5.058801  | -3.661341 |
| 1 | -6.748286  | 7.467630  | -3.604829 |
| 1 | -4.344389  | 1.103424  | -3.174759 |
| 1 | -6.396064  | 0.184608  | -4.176093 |
| 1 | -6.911460  | -2.378357 | -0.780862 |
| 1 | -4.875699  | -1.443444 | 0.231814  |
| 1 | -8.069982  | -1.587340 | -4.222263 |
| 1 | -8.231033  | -2.719259 | -2.887509 |
| 1 | -10.237282 | -1.382918 | -3.140014 |
| 1 | -10.219855 | 1.068338  | -2.513945 |
| 1 | -8.468130  | 1.035372  | -2.577880 |
| 1 | -8.574768  | 0.450103  | -5.033336 |
| 1 | -10.335473 | 0.380567  | -4.936713 |
| 1 | -9.494009  | 1.917476  | -4.704707 |
| 1 | -9.314597  | -2.146923 | -0.859537 |
| 1 | -8.879634  | -0.470557 | -0.567663 |
| 1 | -11.353935 | 0.127321  | -0.996952 |
| 1 | -11.680032 | -1.596044 | -1.076792 |
| 1 | -10.545373 | -0.074931 | 1.324133  |
| 1 | -12.191281 | -0.661017 | 1.153781  |
| 1 | -11.280103 | -3.044841 | 1.043176  |
| 1 | -9.671771  | -2.402784 | 1.399333  |
| 1 | -10.967223 | -2.234551 | 2.584249  |
| 1 | 0.276968   | 0.889348  | 2.937988  |
| 1 | 2.245000   | 1.920800  | 4.013576  |
| 1 | 2.982703   | 4.218931  | 0.469589  |
| 1 | 0.994244   | 3.229203  | -0.588310 |
| 1 | 4.674459   | 4.074885  | 2.330753  |
| 1 | 4.265132   | 3.222760  | 3.817512  |
| 1 | 4.369674   | 5.629127  | 4.173986  |



|   |          |          |           |
|---|----------|----------|-----------|
| 1 | 2.839060 | 4.090349 | 5.460074  |
| 1 | 1.504015 | 4.622383 | 4.455437  |
| 1 | 1.630163 | 5.840967 | 6.667273  |
| 1 | 3.206850 | 6.493340 | 6.207661  |
| 1 | 1.754331 | 6.963537 | 5.316976  |
| 1 | 2.543530 | 7.125236 | 3.304531  |
| 1 | 2.008301 | 5.827083 | 2.252372  |
| 1 | 4.712139 | 7.268523 | 2.183361  |
| 1 | 4.350710 | 5.884777 | 1.170876  |
| 1 | 2.749765 | 8.484560 | 1.158844  |
| 1 | 2.445363 | 7.086024 | 0.136082  |
| 1 | 3.751546 | 8.811630 | -1.121698 |
| 1 | 5.020661 | 8.765817 | 0.109516  |
| 1 | 4.725838 | 7.351805 | -0.906959 |
